# Supplementary material for: Independent expansion, selection, and hypervariability of the TBC1D3 gene family in humans
Source: Genome Res. 2024 Nov;34(11):1798–810. doi: 10.1101/gr.279299.124 (PMC11610581; doi:10.1101/gr.279299.124)
Supplement: Supplement 13 [file Supplemental_Table_S1.xlsx]

## Sheet: Supplemental_Table_S1
Supplemental Table S1: Human Assembly Statistics
Sample	hap	SuperPop	assembly_method	totalBp	nSeqs	mean	0.5	min	max	N50	auN
GRCh38chrOnly	1	NA	NA	3.09Gbp	24	128.68Mbp	133.54Mbp	46.71Mbp	248.96Mbp	156.04Mbp	153.57Mbp
CHM1	1	EUR	NA	3.03Gbp	639	4.75Mbp	43.46Kbp	8.01Kbp	118.38Mbp	59.89Mbp	65.52Mbp
CHM13	1	EUR	NA	3.11Gbp	25	124.48Mbp	133.32Mbp	16.57Kbp	248.39Mbp	150.62Mbp	154.63Mbp
HG00438	1	EAS	Verkko 1.1	3.01Gbp	352	8.57Mbp	49.09Kbp	11.90Kbp	193.25Mbp	103.64Mbp	108.21Mbp
HG00438	2	EAS	Verkko 1.1	3.02Gbp	236	12.79Mbp	53.00Kbp	6.67Kbp	191.28Mbp	103.03Mbp	109.90Mbp
HG00733	1	AMR	Verkko 1.1	3.00Gbp	400	7.50Mbp	36.65Kbp	6.50Kbp	203.20Mbp	134.85Mbp	123.49Mbp
HG00733	2	AMR	Verkko 1.1	3.00Gbp	232	12.92Mbp	46.75Kbp	7.80Kbp	201.24Mbp	136.67Mbp	125.16Mbp
HG00735	1	AMR	Trio-Hifiasm (v.0.14)	3.03Gbp	299	10.15Mbp	312.08Kbp	19.02Kbp	159.64Mbp	53.42Mbp	67.21Mbp
HG00735	2	AMR	Trio-Hifiasm (v.0.14)	3.04Gbp	244	12.45Mbp	911.95Kbp	16.56Kbp	123.74Mbp	56.47Mbp	59.62Mbp
HG01071	1	AMR	Trio-Hifiasm (v.0.14)	3.06Gbp	330	9.26Mbp	550.86Kbp	22.63Kbp	148.18Mbp	55.59Mbp	57.76Mbp
HG01071	2	AMR	Trio-Hifiasm (v.0.14)	3.01Gbp	236	12.77Mbp	1.08Mbp	27.10Kbp	184.36Mbp	50.13Mbp	64.23Mbp
HG01109	1	AMR	Verkko 1.1	3.01Gbp	562	5.36Mbp	34.98Kbp	5.21Kbp	236.40Mbp	81.66Mbp	96.38Mbp
HG01109	2	AMR	Verkko 1.1	2.89Gbp	356	8.13Mbp	36.64Kbp	4.00Kbp	164.30Mbp	82.20Mbp	89.01Mbp
HG01175	1	AMR	Verkko 1.2	3.02Gbp	278	10.88Mbp	58.49Kbp	9.32Kbp	200.53Mbp	87.48Mbp	89.52Mbp
HG01175	2	AMR	Verkko 1.2	3.02Gbp	247	12.21Mbp	64.67Kbp	7.74Kbp	182.17Mbp	109.50Mbp	99.33Mbp
HG01243	1	AMR	Trio-Hifiasm (v.0.14)	2.91Gbp	436	6.67Mbp	295.20Kbp	16.75Kbp	78.53Mbp	29.12Mbp	33.06Mbp
HG01243	2	AMR	Trio-Hifiasm (v.0.14)	3.03Gbp	345	8.78Mbp	1.98Mbp	16.57Kbp	118.53Mbp	31.38Mbp	37.59Mbp
HG01258	1	AMR	Trio-Hifiasm (v.0.14)	2.92Gbp	324	9.00Mbp	445.02Kbp	16.54Kbp	116.99Mbp	49.86Mbp	55.47Mbp
HG01258	2	AMR	Trio-Hifiasm (v.0.14)	3.03Gbp	346	8.76Mbp	349.97Kbp	14.86Kbp	157.90Mbp	56.64Mbp	62.84Mbp
HG01361	1	AMR	Trio-Hifiasm (v.0.14)	3.01Gbp	288	10.45Mbp	431.32Kbp	10.29Kbp	174.83Mbp	47.18Mbp	57.26Mbp
HG01361	2	AMR	Trio-Hifiasm (v.0.14)	3.03Gbp	295	10.26Mbp	791.00Kbp	16.56Kbp	132.68Mbp	45.12Mbp	58.51Mbp
HG01891	1	AFR	Verkko 1.2	3.03Gbp	395	7.68Mbp	34.32Kbp	7.75Kbp	239.95Mbp	123.76Mbp	117.17Mbp
HG01891	2	AFR	Verkko 1.2	3.01Gbp	327	9.22Mbp	33.30Kbp	10.37Kbp	243.96Mbp	133.11Mbp	126.55Mbp
HG01928	1	AMR	Trio-Hifiasm (v.0.14)	2.92Gbp	317	9.22Mbp	424.27Kbp	20.43Kbp	154.53Mbp	45.70Mbp	59.38Mbp
HG01928	2	AMR	Trio-Hifiasm (v.0.14)	3.03Gbp	244	12.40Mbp	1.19Mbp	16.56Kbp	152.51Mbp	53.72Mbp	57.55Mbp
HG01952	1	AMR	Verkko 1.0	2.96Gbp	1011	2.93Mbp	153.37Kbp	12.08Kbp	65.93Mbp	19.04Mbp	22.79Mbp
HG01952	2	AMR	Verkko 1.0	2.82Gbp	1153	2.44Mbp	127.15Kbp	9.79Kbp	68.79Mbp	19.66Mbp	22.92Mbp
HG01978	1	AMR	Trio-Hifiasm (v.0.14)	3.06Gbp	286	10.68Mbp	566.14Kbp	21.64Kbp	137.44Mbp	52.81Mbp	55.62Mbp
HG01978	2	AMR	Trio-Hifiasm (v.0.14)	3.05Gbp	247	12.36Mbp	848.41Kbp	16.57Kbp	128.13Mbp	60.49Mbp	59.11Mbp
HG02080	1	EAS	Trio-Hifiasm (v.0.14)	3.02Gbp	485	6.24Mbp	687.41Kbp	17.38Kbp	75.66Mbp	24.29Mbp	28.55Mbp
HG02080	2	EAS	Trio-Hifiasm (v.0.14)	3.03Gbp	422	7.19Mbp	1.84Mbp	16.56Kbp	83.35Mbp	20.23Mbp	27.12Mbp
HG02148	1	AMR	Trio-Hifiasm (v.0.14)	3.03Gbp	487	6.21Mbp	156.84Kbp	14.34Kbp	111.34Mbp	41.87Mbp	42.08Mbp
HG02148	2	AMR	Trio-Hifiasm (v.0.14)	3.04Gbp	423	7.18Mbp	241.54Kbp	14.93Kbp	104.12Mbp	39.94Mbp	45.84Mbp
HG02257	1	AFR	Trio-Hifiasm (v.0.14)	3.04Gbp	306	9.94Mbp	461.33Kbp	17.03Kbp	134.40Mbp	57.98Mbp	62.54Mbp
HG02257	2	AFR	Trio-Hifiasm (v.0.14)	3.03Gbp	292	10.38Mbp	452.14Kbp	16.57Kbp	121.81Mbp	59.04Mbp	63.70Mbp
HG02486	1	AFR	Verkko 1.2	3.06Gbp	340	9.01Mbp	32.89Kbp	7.84Kbp	235.77Mbp	140.68Mbp	131.21Mbp
HG02486	2	AFR	Verkko 1.2	2.94Gbp	330	8.91Mbp	33.82Kbp	5.82Kbp	227.69Mbp	132.65Mbp	127.40Mbp
HG02622	1	AFR	Trio-Hifiasm (v.0.14)	3.04Gbp	270	11.27Mbp	205.57Kbp	20.60Kbp	103.76Mbp	51.21Mbp	55.29Mbp
HG02622	2	AFR	Trio-Hifiasm (v.0.14)	3.05Gbp	292	10.43Mbp	145.55Kbp	16.57Kbp	139.51Mbp	60.04Mbp	65.20Mbp
HG02630	1	AFR	Trio-Hifiasm (v.0.14)	3.05Gbp	532	5.74Mbp	126.84Kbp	10.24Kbp	76.91Mbp	29.25Mbp	31.68Mbp
HG02630	2	AFR	Trio-Hifiasm (v.0.14)	3.04Gbp	497	6.12Mbp	215.10Kbp	16.57Kbp	83.92Mbp	25.38Mbp	29.89Mbp
HG02723	1	AFR	Verkko 1.1	3.05Gbp	348	8.77Mbp	47.06Kbp	5.05Kbp	178.60Mbp	94.50Mbp	97.30Mbp
HG02723	2	AFR	Verkko 1.1	3.09Gbp	254	12.16Mbp	55.63Kbp	6.17Kbp	242.28Mbp	96.32Mbp	110.64Mbp
HG02886	1	AFR	Trio-Hifiasm (v.0.14)	3.05Gbp	503	6.06Mbp	292.53Kbp	15.28Kbp	87.30Mbp	29.11Mbp	31.41Mbp
HG02886	2	AFR	Trio-Hifiasm (v.0.14)	3.05Gbp	461	6.61Mbp	230.68Kbp	16.57Kbp	114.51Mbp	28.88Mbp	33.91Mbp
HG03453	1	AFR	Trio-Hifiasm (v.0.14)	3.05Gbp	480	6.36Mbp	392.59Kbp	16.57Kbp	63.91Mbp	27.05Mbp	29.27Mbp
HG03453	2	AFR	Trio-Hifiasm (v.0.14)	3.05Gbp	439	6.94Mbp	1.05Mbp	16.57Kbp	90.18Mbp	26.38Mbp	27.55Mbp
HG03492	1	SAS	Trio-Hifiasm (v.0.14)	2.92Gbp	618	4.73Mbp	413.77Kbp	15.77Kbp	51.97Mbp	20.16Mbp	21.88Mbp
HG03492	2	SAS	Trio-Hifiasm (v.0.14)	3.02Gbp	495	6.11Mbp	1.46Mbp	16.57Kbp	68.99Mbp	18.86Mbp	24.60Mbp
HG03516	1	AFR	Trio-Hifiasm (v.0.14)	3.07Gbp	369	8.31Mbp	178.76Kbp	15.71Kbp	158.66Mbp	55.48Mbp	62.20Mbp
HG03516	2	AFR	Trio-Hifiasm (v.0.14)	3.03Gbp	320	9.48Mbp	621.01Kbp	16.10Kbp	134.21Mbp	44.77Mbp	50.42Mbp
HG03540	1	AFR	Trio-Hifiasm (v.0.14)	3.07Gbp	512	5.99Mbp	130.70Kbp	15.27Kbp	88.87Mbp	34.16Mbp	34.16Mbp
HG03540	2	AFR	Trio-Hifiasm (v.0.14)	3.05Gbp	435	7.01Mbp	385.66Kbp	16.57Kbp	96.32Mbp	30.47Mbp	33.87Mbp
NA18906	1	AFR	Trio-Hifiasm (v.0.14)	3.05Gbp	304	10.02Mbp	525.06Kbp	18.30Kbp	109.21Mbp	43.52Mbp	45.95Mbp
NA18906	2	AFR	Trio-Hifiasm (v.0.14)	3.06Gbp	271	11.28Mbp	1.82Mbp	15.32Kbp	96.36Mbp	40.08Mbp	43.31Mbp
NA19240	1	AFR	Trio-Hifiasm (v.0.14)	3.04Gbp	453	6.71Mbp	768.11Kbp	15.87Kbp	70.97Mbp	25.20Mbp	28.93Mbp
NA19240	2	AFR	Trio-Hifiasm (v.0.14)	3.03Gbp	387	7.83Mbp	989.05Kbp	16.57Kbp	71.66Mbp	28.90Mbp	31.47Mbp
NA20129	1	AFR	Trio-Hifiasm (v.0.14)	3.03Gbp	481	6.30Mbp	1.02Mbp	13.66Kbp	58.33Mbp	22.42Mbp	23.09Mbp
NA20129	2	AFR	Trio-Hifiasm (v.0.14)	3.05Gbp	448	6.80Mbp	1.44Mbp	16.37Kbp	92.88Mbp	21.15Mbp	28.32Mbp
NA21309	1	AFR	Trio-Hifiasm (v.0.14)	3.03Gbp	608	4.98Mbp	901.50Kbp	13.19Kbp	53.37Mbp	17.44Mbp	20.91Mbp
NA21309	2	AFR	Trio-Hifiasm (v.0.14)	3.04Gbp	501	6.06Mbp	1.52Mbp	19.66Kbp	70.48Mbp	20.56Mbp	23.77Mbp
HG03579	1	AFR	Verkko 1.4	3.04Gbp	689	4.42Mbp	29.21Kbp	9.77Kbp	246.12Mbp	132.32Mbp	124.92Mbp
HG03579	2	AFR	Verkko 1.4	2.94Gbp	454	6.48Mbp	30.43Kbp	7.84Kbp	234.80Mbp	102.87Mbp	109.40Mbp
HG00741	1	AMR	Verkko 1.4	3.05Gbp	239	12.76Mbp	49.32Kbp	8.45Kbp	202.81Mbp	133.17Mbp	123.66Mbp
HG00741	2	AMR	Verkko 1.4	3.03Gbp	210	14.44Mbp	47.07Kbp	9.82Kbp	252.54Mbp	142.03Mbp	138.30Mbp
HG02717	1	AFR	Verkko 1.4	3.06Gbp	381	8.02Mbp	23.78Kbp	6.13Kbp	243.23Mbp	116.09Mbp	120.92Mbp
HG02717	2	AFR	Verkko 1.4	2.95Gbp	336	8.77Mbp	23.61Kbp	6.14Kbp	241.66Mbp	109.73Mbp	123.16Mbp
HG002	1	EUR	NA	2.95Gbp	25	117.92Mbp	109.23Mbp	16.57Kbp	252.06Mbp	146.79Mbp	154.64Mbp
HG002	2	EUR	NA	3.05Gbp	25	122.07Mbp	133.58Mbp	16.57Kbp	244.02Mbp	154.34Mbp	155.80Mbp
