# Supplementary material for: Independent expansion, selection, and hypervariability of the TBC1D3 gene family in humans
Source: Genome Res. 2024 Nov;34(11):1798–810. doi: 10.1101/gr.279299.124 (PMC11610581; doi:10.1101/gr.279299.124)
Supplement: Supplement 14 [file Supplemental_Table_S2.xlsx]

## Sheet: Supplemental_Table_S2
Supplemental Table S2: Human Assembly HiFi and ONT Sequencing Statistics
Sample	ONT Read N50	ONT Gb	ONT coverage	ONT 100kb+	HiFi Read N50	HiFi Gbp	HiFi coverage
CHM1	NA	NA	NA	NA	NA	NA	NA
CHM13	NA	NA	NA	NA	NA	NA	NA
GRCh38chrOnly	NA	NA	NA	NA	NA	NA	NA
HG002	NA	NA	710	66	14446	550.89	180.336
HG00438	73532	136.61	41.4	14.67	22619	127.47	41.7276
HG00735	76977	102.66	31.11	11.68	22328	133.5	43.6999
HG00741	79828	145.37	44.05	17.29	24843	119.23	39.0308
HG01071	76951	132.38	40.12	15.29	26926	108.93	35.6591
HG01109	-	-	59	2.5	21163	99.78	32.6622
HG01175	75225	148.25	44.93	16.59	21602	111.94	36.6438
HG01243	-	-	60	6	19528	109.24	35.7599
HG01258	91791	69.81	21.16	9.73	20342	111.15	36.3848
HG01361	67140	107.71	32.63	10.69	20026	130	42.5541
HG01891	79570	120.77	36.6	14.72	17039	115.13	37.6867
HG01928	82260	85.01	25.76	10.49	23609	108.9	35.6493
HG01952	72206	103.55	31.38	11.06	21109	127.85	41.8523
HG01978	77617	128.37	38.91	14.67	26203	117.57	38.4868
HG02080	-	-	56	6	21313	105.9	34.6649
HG02148	61223	60.91	18.45	5.63	16942	123.24	40.3438
HG02257	76136	85.04	25.77	9.56	19246	110.64	36.2166
HG02486	64367	95	28.79	8.62	18626	123.9	40.5606
HG02622	87046	47.62	14.43	6.29	22882	143.99	47.1361
HG02630	88601	64.53	19.56	8.72	19196	151.01	49.4341
HG02717	72917	88.93	26.94	9.75	16751	140.3	45.9272
HG02723	63.22	-	131.74	38.64	15693	143.29	46.9076
HG02886	81798	106.81	32.37	13.26	17624	137.41	44.9805
HG03453	93224	36.08	10.94	5.07	19883	160.25	52.4598
HG03492	NA	NA	51	3	21008	104.36	34.1618
HG03516	75811	141.52	42.89	16.3	18663	110.25	36.0893
HG03540	81809	95.38	28.91	11.78	20527	153.41	50.2184
HG03579	87729	51.94	15.73	6.91	19408	149.99	49.0995
NA18906	NA	NA	NA	NA	21232	130.85	42.834
NA19240	NA	NA	NA	NA	17682	125.18	40.9779
NA20129	NA	NA	NA	NA	17708	116.26	38.0589
NA21309	NA	NA	NA	NA	16551	122.41	40.0712
