# Supplementary material for: Independent expansion, selection, and hypervariability of the TBC1D3 gene family in humans
Source: Genome Res. 2024 Nov;34(11):1798–810. doi: 10.1101/gr.279299.124 (PMC11610581; doi:10.1101/gr.279299.124)
Supplement: Supplement 15 [file Supplemental_Table_S3.xlsx]

## Sheet: Supplemental_Table_S3
Supplemental Table S3: Human Assembly TBC1D3 Statistics
Sample	hap	assembly_copy_num	TBC_exp1_copy_num	TBC_exp2_copy_num	TBC_exp1_size	TBC_exp2_size	kmer_diplotype_copy_num	illumina_WGS_wssd_diplotype_copy_number
GRCh38chrOnly	1	14	6	6	534298	595537	NA	NA
CHM1	1	14	6	6	534307	595654	NA	NA
CHM13	1	11	5	4	572148	471455	NA	NA
HG00438	1	15	6	7	624623	648304	26.3	28.5
HG00438	2	12	8	2	762494	391802	26.3	28.5
HG00733	1	19	9	8	769671	684890	28.46	31.23
HG00733	2	12	6	4	544270	525504	28.46	31.23
HG00735	1	10	6	2	534428	391473	23.5	25.5
HG00735	2	15	9	4	759809	471485	23.5	25.5
HG01071	1	10	4	4	440634	471443	20.5	21.9
HG01071	2	11	5	4	572077	515820	20.5	21.9
HG01109	1	19	8	9	774207	827909	32.5	34.5
HG01109	2	16	10	4	2073405	1589665	32.5	34.5
HG01175	1	7	1	4	250249	471080	17.6	19
HG01175	2	11	5	4	478249	471535	17.6	19
HG01243	1	7	3	2	322430	391516	18.2	19.4
HG01243	2	12	7	2	622679	391523	18.2	19.4
HG01258	1	6	2	2	309731	391920	17.8	18.8
HG01258	2	12	6	4	534400	515481	17.8	18.8
HG01361	1	10	6	2	534218	391529	21.3	23.3
HG01361	2	12	6	4	596303	471101	21.3	23.3
HG01891	1	9	3	4	397758	494196	25.5	27.6
HG01891	2	18	10	6	837564	550994	25.5	27.6
HG01928	1	18	9	7	759781	648239	30.1	33
HG01928	2	15	9	4	759856	471487	30.1	33
HG01952	1	15	9	4	759697	471497	22.8	22.2
HG01952	2	7	3	2	397674	391881	22.8	22.2
HG01978	1	20	6	12	534232	870344	33.8	36.4
HG01978	2	17	9	6	759822	595326	33.8	36.4
HG02080	1	12	8	2	687148	391843	19.5	21.4
HG02080	2	8	4	2	535886	391807	19.5	21.4
HG02148	1	10	6	2	534205	391822	16.7	18.2
HG02148	2	7	1	4	250236	471511	16.7	18.2
HG02257	1	19	9	8	824977	675619	23.8	26.3
HG02257	2	6	2	2	271436	391456	23.8	26.3
HG02486	1	16	6	8	534487	711372	33.1	36.1
HG02486	2	20	4	14	470484	959636	33.1	36.1
HG02622	1	10	5	3	521596	423803	30.5	33.2
HG02622	2	23	13	8	1052836	673635	30.5	33.2
HG02630	1	28	12	8	1056262	630477	39	42.6
HG02630	2	15	5	8	521981	675007	39	42.6
HG02723	1	11	3	6	349226	595446	30.7	33.3
HG02723	2	22	9	11	806089	904953	30.7	33.3
HG02886	1	20	10	8	837679	775073	34.6	37.5
HG02886	2	18	7	9	622574	687898	34.6	37.5
HG03453	1	16	6	8	534514	721244	29.4	32.2
HG03453	2	16	5	9	482942	687867	29.4	32.2
HG03492	1	14	6	6	534368	550729	27.8	29.2
HG03492	2	16	5	8	572121	676340	27.8	29.2
HG03516	1	16	4	10	485950	800534	31.3	35
HG03516	2	18	8	8	658644	675642	31.3	35
HG03540	1	17	9	6	824836	595540	31.1	33.3
HG03540	2	16	4	10	373713	784206	31.1	33.3
NA18906	1	19	10	7	860724	659968	35.5	38.9
NA18906	2	19	6	11	596139	863389	35.5	38.9
NA19240	1	23	14	7	1182507	646481	42.7	46.8
NA19240	2	24	14	8	1127904	721084	42.7	46.8
NA20129	1	21	8	11	747191	845142	35.9	38.7
NA20129	2	18	9	7	759784	648271	35.9	38.7
NA21309	1	22	8	7	736759	683282	33.2	34.5
NA21309	2	13	5	6	521464	586315	33.2	34.5
HG03579	1	24	10	12	837616	880074	41	41.9
HG03579	2	19	11	6	959115	595995	41	41.9
HG00741	1	12	6	4	534380	471469	22.5	24.5
HG00741	2	12	6	4	534322	471481	22.5	24.5
HG02717	1	24	10	12	928410	967440	39.7	41.2
HG02717	2	17	9	6	811551	595443	39.7	41.2
HG002	1	17	6	9	534346	726341	29.9	33.6
HG002	2	16	3	11	322509	805748	29.9	33.6
