# Supplementary material for: Independent expansion, selection, and hypervariability of the TBC1D3 gene family in humans
Source: Genome Res. 2024 Nov;34(11):1798–810. doi: 10.1101/gr.279299.124 (PMC11610581; doi:10.1101/gr.279299.124)
Supplement: Supplement 16 [file Supplemental_Table_S4.xlsx]

## Sheet: Supplemental_Table_S4
Supplemental Table S4: Primate Assembly Statistics
Species	Scientific Name	Sample Name	Hap	Assembly method	TotalBp (Gbp)	N50	AuN
human	Homo sapiens	T2T	1	NA	3.117	150.62	154.571
human	Homo sapiens	HG02723	2	Verkko 1.4	3.088	96.32	110.644
gorilla	Gorilla gorilla	Jim	1	Verkko 1.4	3.505	151.56	161.831
gorilla	Gorilla gorilla	Jim	2	Verkko 1.4	3.35	150.8	157.04
chimp	Pan troglodytes	AG18354_PTR	1	Verkko 1.4	3.146	147.43	147.435
chimp	Pan troglodytes	AG18354_PTR	2	Verkko 1.4	3.02	140.84	145.971
bonobo	Pan paniscus	PR00251_PPA	1	Verkko 1.4	3.206	147.03	149.437
bonobo	Pan paniscus	PR00251_PPA	2	Verkko 1.4	3.071	147.48	146.475
Sumatran orangutan	Pongo abelii	AG06213_PAB	1	Verkko 1.4	3.151	144.74	149.937
Sumatran orangutan	Pongo abelii	AG06213_PAB	2	Verkko 1.4	3.088	140.6	147.769
Bornean orangutan	Pongo pygmaeus	AG05252_PPY	1	Verkko 1.4	3.153	140.99	148.428
Bornean orangutan	Pongo pygmaeus	AG05252_PPY	2	Verkko 1.4	3.059	140.97	146.581
macaque	Macaca mulata	AG07107	1	hifiasm 0.15.2	3.111	18.81	23.74
macaque	Macaca mulata	AG07107	2	hifiasm 0.15.2	3.121	19.01	36.949
marmoset	Callithrix jacchus	CJ1700_CJA	1	hifiasm 0.15.2	2.931	103.97	95
marmoset	Callithrix jacchus	CJ1700_CJA	2	hifiasm 0.15.2	2.909	87.06	84.954
gelada	Theropithecus gelada	DRT_2020_14	1	hifiasm 0.15.2	3.112	109.07	108.157
gelada	Theropithecus gelada	DRT_2020_14	2	hifiasm 0.15.2	3.11	93.89	89.908
gibbon	Symphalangus syndactylus	Jambi_SSY	1	Verkko 1.4	3.241	144.67	136.725
gibbon	Symphalangus syndactylus	Jambi_SSY	2	Verkko 1.4	3.106	145.5	134.762
owl monkey	Aotus lemurinus	86718_ANA	1	hifiasm 0.15.2	3.098	55.92	55.764
owl monkey	Aotus lemurinus	86718_ANA	2	hifiasm 0.15.2	3.041	44.99	54.014
mouse lemur	Microcebus murinus	Inina_MMUR	1	hifiasm 0.15.2	2.355	29.39	37.127
mouse lemur	Microcebus murinus	Inina_MMUR	2	hifiasm 0.15.2	2.337	26.77	33.053
