# Supplementary material for: Independent expansion, selection, and hypervariability of the TBC1D3 gene family in humans
Source: Genome Res. 2024 Nov;34(11):1798–810. doi: 10.1101/gr.279299.124 (PMC11610581; doi:10.1101/gr.279299.124)
Supplement: Supplement 17 [file Supplemental_Table_S5.xlsx]

## Sheet: Supplemental_Table_S5
Supplemental Table S5: Primate TBC1D3 copy number
Species	Scientific Name	Number of TBC1D3 loci per haplotype |	Number of TBC1D3 genes
			(Hap1 | Hap2)
Human ***	Homo sapiens	4 | 4	11 | 22
Gorilla*	Gorilla gorilla	4 | 4	13 | 11
Chimpanzee*	Pan troglodytes	4 | 4	8 | 8
Bonobo*	Pan paniscus	4 | 4	9 | 9
Sumatran orangutan*	Pongo abelii	8 | 9	23 | 23
Bornean orangutan*	Pongo pygmaeus	5 | 7	17 | 21
Gibbon*	Symphalangus syndactylus	11 | 11	31 | 30
Macaque**	Macaca mulatta	4 | 4	29 | 20
Gelada	Theropithecus gelada	3 | 3	31 | 24
Owl monkey**	Aotus nancymaae	4 | 4	8 | 8
Marmoset**	Callithrix jacchus	2 | 2	2 | 2
Mouse Lemur	Microcebus murinus	0 | 0	0 | 0
*Genomes sequenced as part of the Primate T2T Consortium (Makova et al. 2023).
**Genomes sequenced and assembled as part of Mao et al. 2024.
***Genomes sequenced as part of human T2T project and Human Pangenome Reference Consortium (Nurk et al. 2022; Liao et al. 2023)
