# Supplementary material for: Independent expansion, selection, and hypervariability of the TBC1D3 gene family in humans
Source: Genome Res. 2024 Nov;34(11):1798–810. doi: 10.1101/gr.279299.124 (PMC11610581; doi:10.1101/gr.279299.124)
Supplement: Supplement 18 [file Supplemental_Table_S6.xlsx]

## Sheet: Supplemental_Table_S6
Supplemental Table S6: TBC1D3 blastn in mouse lemur assembly
Mouse Lemur Contig	Contig Length (Kbp)	Alignment Start	Alignment End	Percent Identity	matches	mismatches	deletion events
h2tg000134l	1703	47882	48001	98.3	117	0	1
h2tg000138l	3866	3827725	3827818	98.9	92	0	0
h2tg000004l	72074	17977134	17977257	99.3	122	0	0
h2tg000112l	13746	5126011	5126079	100	68	0	0
h2tg000045l	58162	18906962	18907040	100	78	0	0
h2tg000044l	56769	10440427	10440488	98.4	61	0	1
h2tg000123l	38913	25474620	25474704	96.5	82	0	2
h2tg000038l	10979	5998913	5999012	98	98	0	1
h2tg000044l	56769	35690062	35690115	98.1	53	0	1
h2tg000049l	19634	15036293	15036413	96.6	115	0	2
h2tg000100l	6749	1090755	1090813	98.3	58	0	1
h2tg000317l	734	477484	477689	97	194	0	5
h2tg000317l	734	476107	476201	97.9	94	0	2
