# Supplementary material for: Independent expansion, selection, and hypervariability of the TBC1D3 gene family in humans
Source: Genome Res. 2024 Nov;34(11):1798–810. doi: 10.1101/gr.279299.124 (PMC11610581; doi:10.1101/gr.279299.124)
Supplement: Supplement 19 [file Supplemental_Table_S7.xlsx]

## Sheet: Supplemental_Table_S7
Supplemental Table S7: Primate Iso-Seq TBC1D3 Mapping Data
Sample	Species	Reference	TBC1D3 reference mappings	Total Reads	Reads mapped to TBC1D3
Human Fetal Brain	human	T2T Version 2	14	232701	33138
Human IPSC	human	T2T Version 2	14	264000000	11366
gorilla_hap1_testis_1	gorilla	Jim_GGO Hap1	15	4680000	557
gorilla_hap2_testis_1	gorilla	Jim_GGO Hap2	15	4680000	557
chimp_hap1_testis_2	chimpanzee	AG18354_PTR_Hap1	8	3000000	1461
chimp_hap2_testis_2	chimpanzee	AG18354_PTR_Hap2	8	3000000	1461
bonobo_hap1_testis_2	bonobo	PR00251_PPA_Hap1	9	2230000	915
bonobo_hap2_testis_2	bonobo	PR00251_PPA_Hap2	9	2230000	915
sum_orang_hap1_testis_1	Sumatran orangutan	AG06213_PAB_Hap1	28	3110000	2032
sum_orang_hap2_testis_2	Sumatran orangutan	AG06213_PAB_Hap2	25	3110000	2032
born_orang_hap1_testis_1	Bornean orangutan	AG05252_PPY_Hap1	20	4200000	6836
born_orang_hap2_testis_1	Bornean orangutan	AG05252_PPY_Hap2	22	4200000	6836
marmoset_hap1_frontal_cortex	marmoset	CJ1700_CJA Hap1	1	485000	0
marmoset_hap2_frontal_cortex	marmoset	CJ1700_CJA Hap2	0	485000	0
