# Supplementary material for: Independent expansion, selection, and hypervariability of the TBC1D3 gene family in humans
Source: Genome Res. 2024 Nov;34(11):1798–810. doi: 10.1101/gr.279299.124 (PMC11610581; doi:10.1101/gr.279299.124)
Supplement: Supplement 20 [file Supplemental_Table_S8.xlsx]

## Sheet: Supplemental_Table_S8
Supplemental Table S8: absREL branch-site model multiple test correction
Branch	B	LRT	uncorrected p-value	corrected p-value	omega distribution	omega 1	omega 2
1	0	9.2694	0.0101	0.0034		0 (94%)	52.6 (6.1%)
2	0	0.1584	0.4153	0.4153		1.55 (100%)	0
3	0	0.3256	0.3686	0.7372		1000 (100%)	0
