# Supplementary material for: Independent expansion, selection, and hypervariability of the TBC1D3 gene family in humans
Source: Genome Res. 2024 Nov;34(11):1798–810. doi: 10.1101/gr.279299.124 (PMC11610581; doi:10.1101/gr.279299.124)
Supplement: Supplement 21 [file Supplemental_Table_S9.xlsx]

## Sheet: Supplemental_Table_S9
Supplemental Table S9: TBC1D3 Flanking Nucleotide Diversity and Tajima's D
Chrom	Start	End	PI	TD	Callable	Sedef	Gene	Percentile Pi	Percentile Tajima's D	Region
chr17	36980000	37000000	0.00132334	-0.639926	1	0.09375		0.728268	0.562003	TBC1D3_exp1_upstream
chr17	36990000	37010000	0.00102332	-0.923755	1	0.04665		0.508205	0.371565	TBC1D3_exp1_upstream
chr17	37000000	37020000	0.000650703	-1.10647	1	0	CCL18	0.164634	0.256486	TBC1D3_exp1_upstream
chr17	37010000	37030000	0.000750381	-1.32907	1	0.174	CCL18	0.249757	0.1447	TBC1D3_exp1_upstream
chr17	37020000	37040000	0.0011296	-1.3076	1	0.674	CCL3	0.597622	0.15373	TBC1D3_exp1_upstream
chr17	37450000	37470000	0.000458024	-1.2487	1	0		0.0483092	0.18073	TBC1D3_exp1_downstream
chr17	37460000	37480000	0.000466824	-1.78702	1	0	ZNHIT3	0.0518601	0.0260045	TBC1D3_exp1_downstream
chr17	37470000	37490000	0.00050652	-1.7946	1	0	ZNHIT3,MYO19	0.0701828	0.0251619	TBC1D3_exp1_downstream
chr17	38860000	38880000	0.00110097	-0.423053	1	1		0.5746	0.693053	TBC1D3_exp2_upstream
chr17	38870000	38890000	0.00131639	-0.0159706	1	1		0.724139	0.865972	TBC1D3_exp2_upstream
chr17	38880000	38900000	0.000944353	-0.599377	1	0.88045		0.435089	0.587714	TBC1D3_exp2_upstream
chr17	38890000	38910000	0.000802733	-1.18807	1	0.66825		0.298823	0.211571	TBC1D3_exp2_upstream
chr17	39120000	39140000	0.000415136	-0.352504	1	1		0.0327967	0.730874	TBC1D3_exp2_downstream_last_gc
chr17	39130000	39150000	0.000477176	0.250231	1	1		0.0563281	0.928006	TBC1D3_exp2_downstream_last_gc
chr17	39140000	39160000	0.000701443	0.223506	1	1		0.206496	0.923186	TBC1D3_exp2_downstream_last_gc
chr17	39160000	39180000	0.000541924	-0.714051	1	0.91875	MRPL45	0.0891404	0.513541	TBC1D3_exp2_downstream_last_SD
