# Supplementary material for: Independent expansion, selection, and hypervariability of the TBC1D3 gene family in humans
Source: Genome Res. 2024 Nov;34(11):1798–810. doi: 10.1101/gr.279299.124 (PMC11610581; doi:10.1101/gr.279299.124)
Supplement: Supplement 22 [file Supplemental_Table_S10.xlsx]

## Sheet: Supplemental_Table_S10
Supplemental Table S10: Primate genome assembly statistics.
Species	Scientific Name	HiFi Coverage	ONT	Assembly	Assembly N50
			Coverage	Method	(Hap1 | Hap2) (Mbp)
Gelada	Theropithecus gelada	50.24	NA	Hifiasm 0.15.2	109.0 | 93.6
Mouse Lemur	Microcebus murinus	30.25	NA	Hifiasm 0.15.2	29.4 | 26.7
Human	Homo sapiens	30	120	NA	150.62
Gorilla*	Gorilla gorilla	107	165	Verkko 1.4	151.43 | 150.80
Chimpanzee*	Pan troglodytes	69	127	Verkko 1.4	147.43 | 140.84
Bonobo*	Pan paniscus	131	169	Verkko 1.4	147.03 | 147.48
Sumatran orangutan*	Pongo abelii	102	91.9	Verkko 1.4	143.46 | 140.60
Bornean orangutan*	Pongo pygmaeus	62.6	200	Verkko 1.4	139.77 | 139.21
Gibbon*	Symphalangus syndactylus	83.2	111	Verkko 1.4	144.67 | 145.50
Macaque**	Macaca mulatta	38.91	NA	Hifiasm 0.15.2	18.81 | 19.01
Owl Monkey**	Aotus nancymaae	36.57	NA	Hifiasm 0.15.2	55.92 | 44.99
Marmoset**	Callithrix jacchus	39.08	NA	Hifiasm 0.15.2	103.97 | 87.06
*Genomes sequenced as part of the Primate T2T Consortium (Makova et al. 2023).
**Genomes sequenced and assembled as part of Mao et al. 2024.
