# Supplementary material for: Independent expansion, selection, and hypervariability of the TBC1D3 gene family in humans
Source: Genome Res. 2024 Nov;34(11):1798–810. doi: 10.1101/gr.279299.124 (PMC11610581; doi:10.1101/gr.279299.124)
Supplement: Supplement 23 [file Supplemental_Table_S11.xlsx]

## Sheet: Supplemental_Table_S11
Supplemental Table S11: TBC1D3 Probes for Iso-Seq Capture
Target	Sequence
TBC1D3_target_1_1	ATGGACGTGGTAGAGGTCGCGGGCAGTTGGTGGGCACAAGAGCGAGAGGACATCATTATGAAATACGAAAAGGGACACCGAGCTGGGCTGCCAGAGGACAAGGGGCCTAAGCCTTTTCGA
TBC1D3_target_1_2	AGCTACAACAACAACGTCGATCATTTGGGGATTGTACATGAGACGGAGCTGCCTCCTCTGACTGCGCGGGAGGCGAAGCAAATTCGGCGGGAGATCAGCCGAAAGAGCAAGTGGGTGGAT
TBC1D3_target_1_3	ATGCTGGGAGACTGGGAGAAATACAAAAGCAGCAGAAAGCTCATAGATCGAGCGTACAAGGGAATGCCCATGAACATCCGGGGCCCGATGTGGTCAGTCCTCCTGAACACTGAGGAAATG
TBC1D3_target_1_4	AAGTTGAAAAACCCCGGAAGATACCAGATCATGAAGGAGAAGGGCAAGAGGTCATCTGAGCACATCCAGCGCATCGACCGGGACGTAAGCGGGACATTAAGGAAGCATATATTCTTCAGG
TBC1D3_target_1_5	GATCGATACGGAACCAAGCAGCGGGAACTACTCCACATCCTCCTGGCATATGAGGAGTACAACCCGGAGGTGGGCTACTGCAGGGACCTGAGCCACATCGCCGCCTTGTTCCTCCTCTAT
TBC1D3_target_1_6	CTTCCTGAGGAGGATGCATTCTGGGCACTGGTGCAGCTGCTGGCCAGTGAGAGGCACTCCCTGCAGGGATTTCACAGCCCAAATGGCGGGACCGTCCAGGGGCTCCAAGACCAACAGGAG
TBC1D3_target_1_7	CATGTGGTAGCCACGTCACAACCCAAGACCATGGGGCATCAGGACAAGAAAGATCTATGTGGGCAGTGTTCCCCGTTAGGCTGCCTCATCCGGATATTGATTGACGGGATCTCTCTCGGG
TBC1D3_target_1_8	CTCACCCTGCGCCTGTGGGACGTGTATCTGGTAGAAGGCGAACAGGCGTTGATGCCGATAACAAGAATCGCCTTTAAGGTTCAGCAGAAGCGCCTCACGAAGACGTCCAGGTGTGGCCCG
TBC1D3_target_1_9	TGGGCACGTTTTTGCAACCGGTTCGTTGATACCTGGGCCAGGGATGAGGACACTGTGCTCAAGCATCTTAGGGCCTCTATGAAGAAACTAACAAGAAAGAAGGGGGACCTGCCACCCCCA
TBC1D3_target_1_10	GCCAAACCCGAGCAAGGGTCGTCGGCATCCAGGCCTGTGCCGGCTTCACGTGGCGGGAAGACCCTCTGCAAGGGGGACAGGCAGGCCCCTCCAGGCCCACCAGCCCGGTTCCCGCGGCCC
TBC1D3_target_1_11	ATTTGGTCAGCTTCCCCGCCACGGGCACCTCGTTCTTCCACACCCTGTCCTGGTGGGGCTGTCCGGGAAGACACCTACCCTGTGGGCACTCAGGGTGTGCCCAGCCCGGCCCTGGCTCAG
TBC1D3_target_1_12	GGAGGACCTCAGGGTTCCTGGAGATTCCTGCAGTGGAACTCCATGCCCCGCCTCCCAACGGACCTGGACGTAGAGGGCCCTTGGTTCCGCCATTATGATTTCAGGCAGAGCTGCTGGGTC
TBC1D3_target_1_13	CGTGCCATATCCCAGGAGGACCAGCTGGCCCCCTGCTGGCAGGCTGAACACCCTGCGGAGCGGGTGAGATCGGCTTTCGCTGCACCCAGCACTGATTCCGACCAGGGCACCCCCTTC
