# Supplementary material for: Independent expansion, selection, and hypervariability of the TBC1D3 gene family in humans
Source: PubMed Central journal article supplement (PMC11610581; doi:10.1101/gr.279299.124), 2024-11
Supplement: Supplemental_Fig_S1.pdf [file Supplemental_Fig_S1.pdf]

A

HG00438 Hap 1

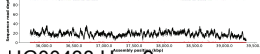

HG00438 Hap 2

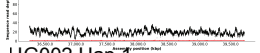

HG002 Hap 1

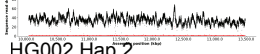

HG002 Hap 2

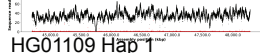

HG01109 Hap 1

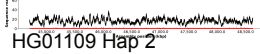

HG01109 Hap 2

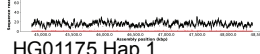

HG01175 Hap 1

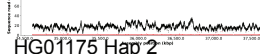

HG01175 Hap 2

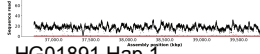

HG01891 Hap 1

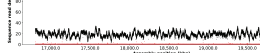

HG01891 Hap 2

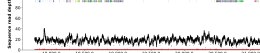

HG01952 Hap 1

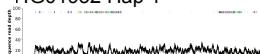

HG01952 Hap 2

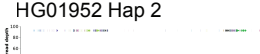

HG02486 Hap 1

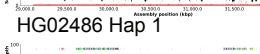

HG02486 Hap 2

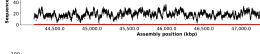

HG02723 Hap 1

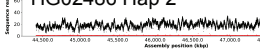

HG02723 Hap 2

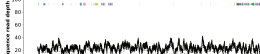

HG00741 Hap 2

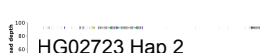

HG00741 Hap 1

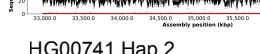

HG02717 Hap 2

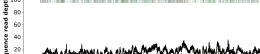

HG02717 Hap 1

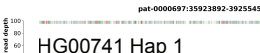

HG00735 TBC1D3 Cluster 1

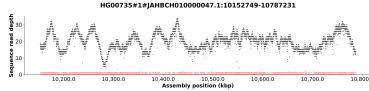

HG00735 TBC1D3 Cluster 2

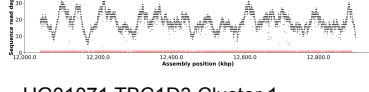

HG01071 TBC1D3 Cluster 1

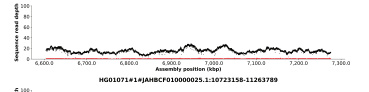

HG01071 TBC1D3 Cluster 2

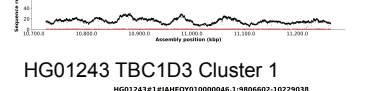

HG01243 TBC1D3 Cluster 1

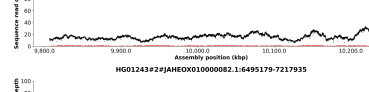

HG01243 TBC1D3 Cluster 2

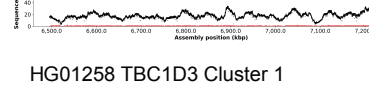

HG01258 TBC1D3 Cluster 1

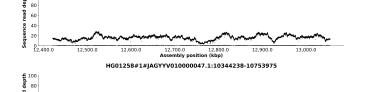

HG01258 TBC1D3 Cluster 2

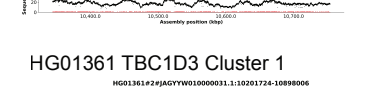

HG01361 TBC1D3 Cluster 1

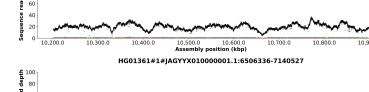

HG01361 TBC1D3 Cluster 2

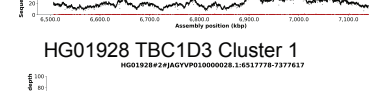

HG01928 TBC1D3 Cluster 1

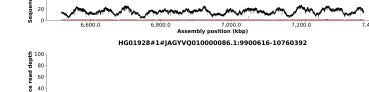

HG01928 TBC1D3 Cluster 2

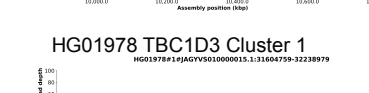

HG01978 TBC1D3 Cluster 1

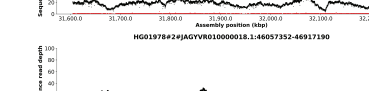

HG01978 TBC1D3 Cluster 2

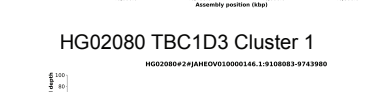

HG02080 TBC1D3 Cluster 1

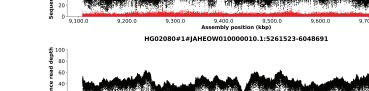

HG02080 TBC1D3 Cluster 2

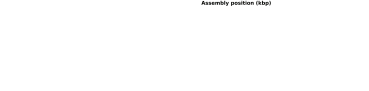

HG00735 TBC1D3 Cluster 1

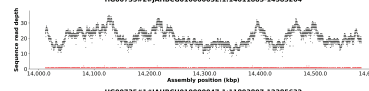

HG00735 TBC1D3 Cluster 2

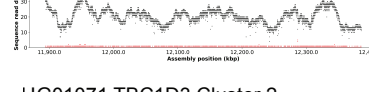

HG01071 TBC1D3 Cluster 1

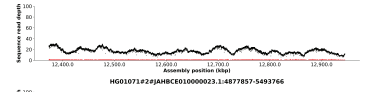

HG01071 TBC1D3 Cluster 2

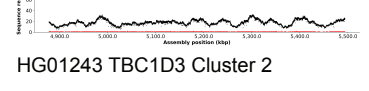

HG01243 TBC1D3 Cluster 1

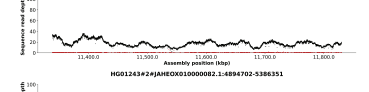

HG01243 TBC1D3 Cluster 2

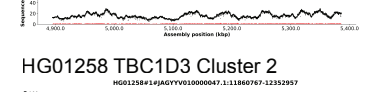

HG01258 TBC1D3 Cluster 1

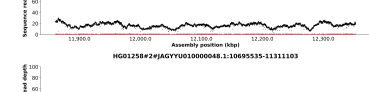

HG01258 TBC1D3 Cluster 2

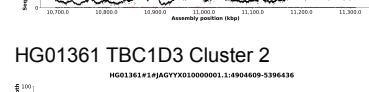

HG01361 TBC1D3 Cluster 1

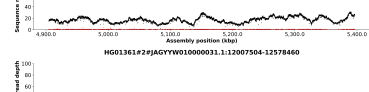

HG01361 TBC1D3 Cluster 2

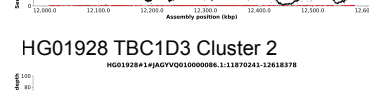

HG01928 TBC1D3 Cluster 1

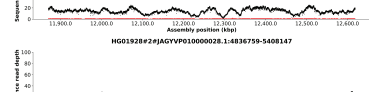

HG01928 TBC1D3 Cluster 2

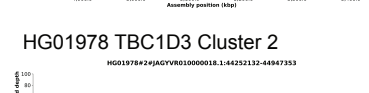

HG01978 TBC1D3 Cluster 1

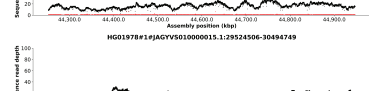

HG01978 TBC1D3 Cluster 2

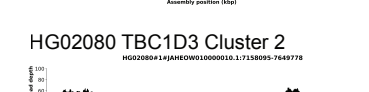

HG02080 TBC1D3 Cluster 1

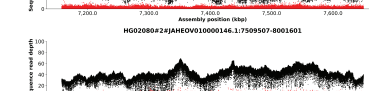

HG02080 TBC1D3 Cluster 2

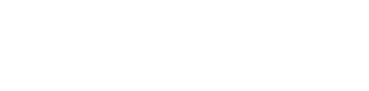

B

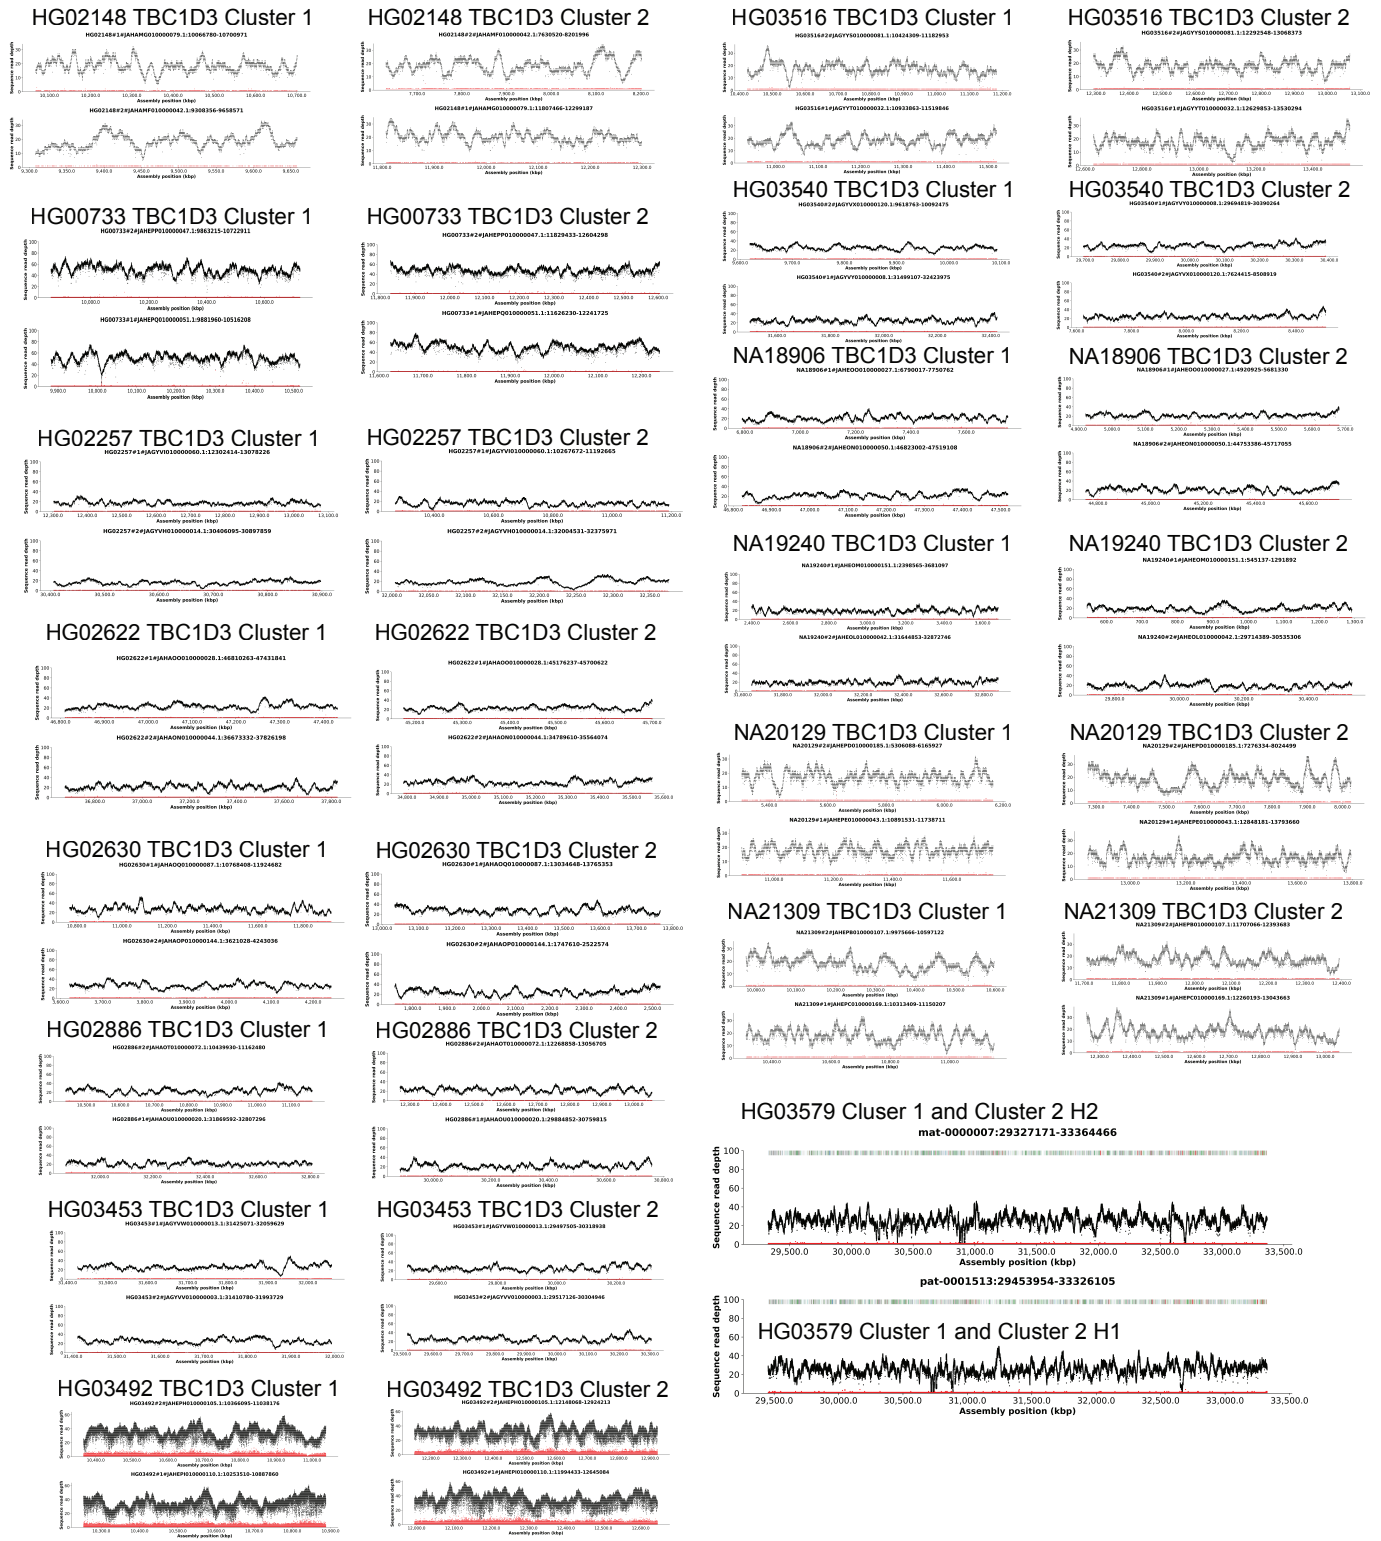

**Supplemental Figure S1: NucFreq validation.** Haplotype assembly accuracy was tested with NucFreq. Here, accuracy over each haplotype of *TBC1D3* cluster 1 and cluster 2 is demonstrated. Endogenous HiFi reads used to assemble respective phylogenies were mapped back onto the respective assemblies. We illustrated primary and secondary most prevalent base calls for reads aligned over a portion of an assembly in black and red, respectively. We expect primary base-call coverage to be relatively consistent, and consistently higher than the secondary base call, which should illustrate the sparse inaccuracies of HiFi sequencing.
