# Supplementary material for: Independent expansion, selection, and hypervariability of the TBC1D3 gene family in humans
Source: PubMed Central journal article supplement (PMC11610581; doi:10.1101/gr.279299.124), 2024-11
Supplement: Supplemental_Fig_S3.pdf [file Supplemental_Fig_S3.pdf]

A

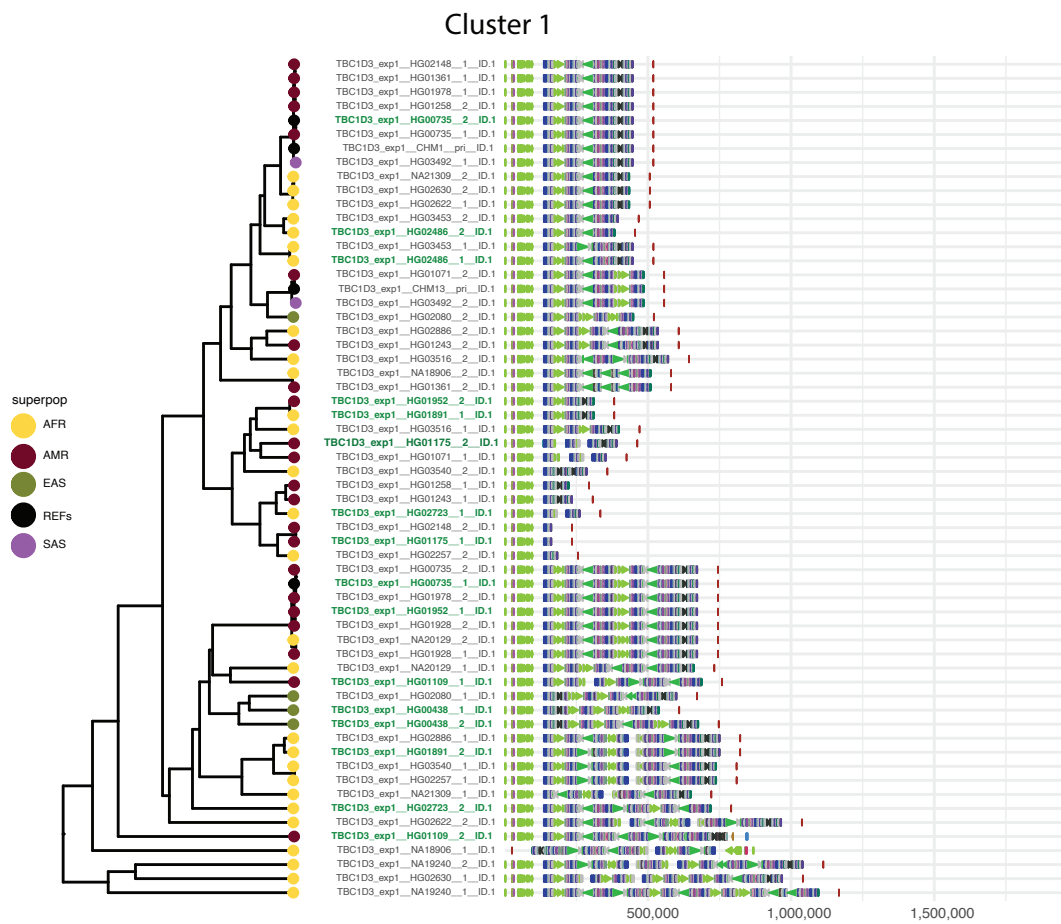

B

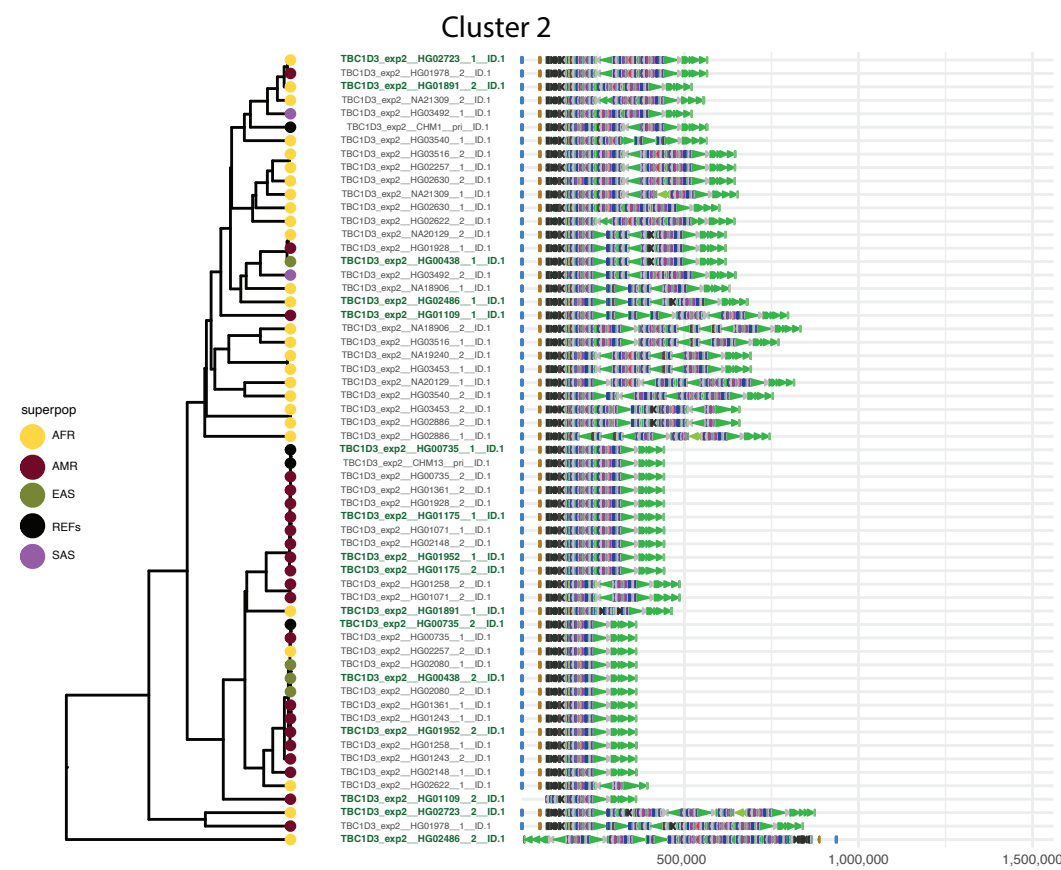

**Supplemental Figure S3: UPGMA clustering of *TBC1D3*.** We hierarchically clustered validated assemblies based on duplcon content using UPGMA for cluster 1 (A) and 2 (B) (Methods). Superpopulations for each haplotype are included in the dendrogram, and assemblies rescued with Verkko are colored in green.
