# Supplementary material for: Independent expansion, selection, and hypervariability of the TBC1D3 gene family in humans
Source: PubMed Central journal article supplement (PMC11610581; doi:10.1101/gr.279299.124), 2024-11
Supplement: Supplemental_Fig_S7.pdf [file Supplemental_Fig_S7.pdf]

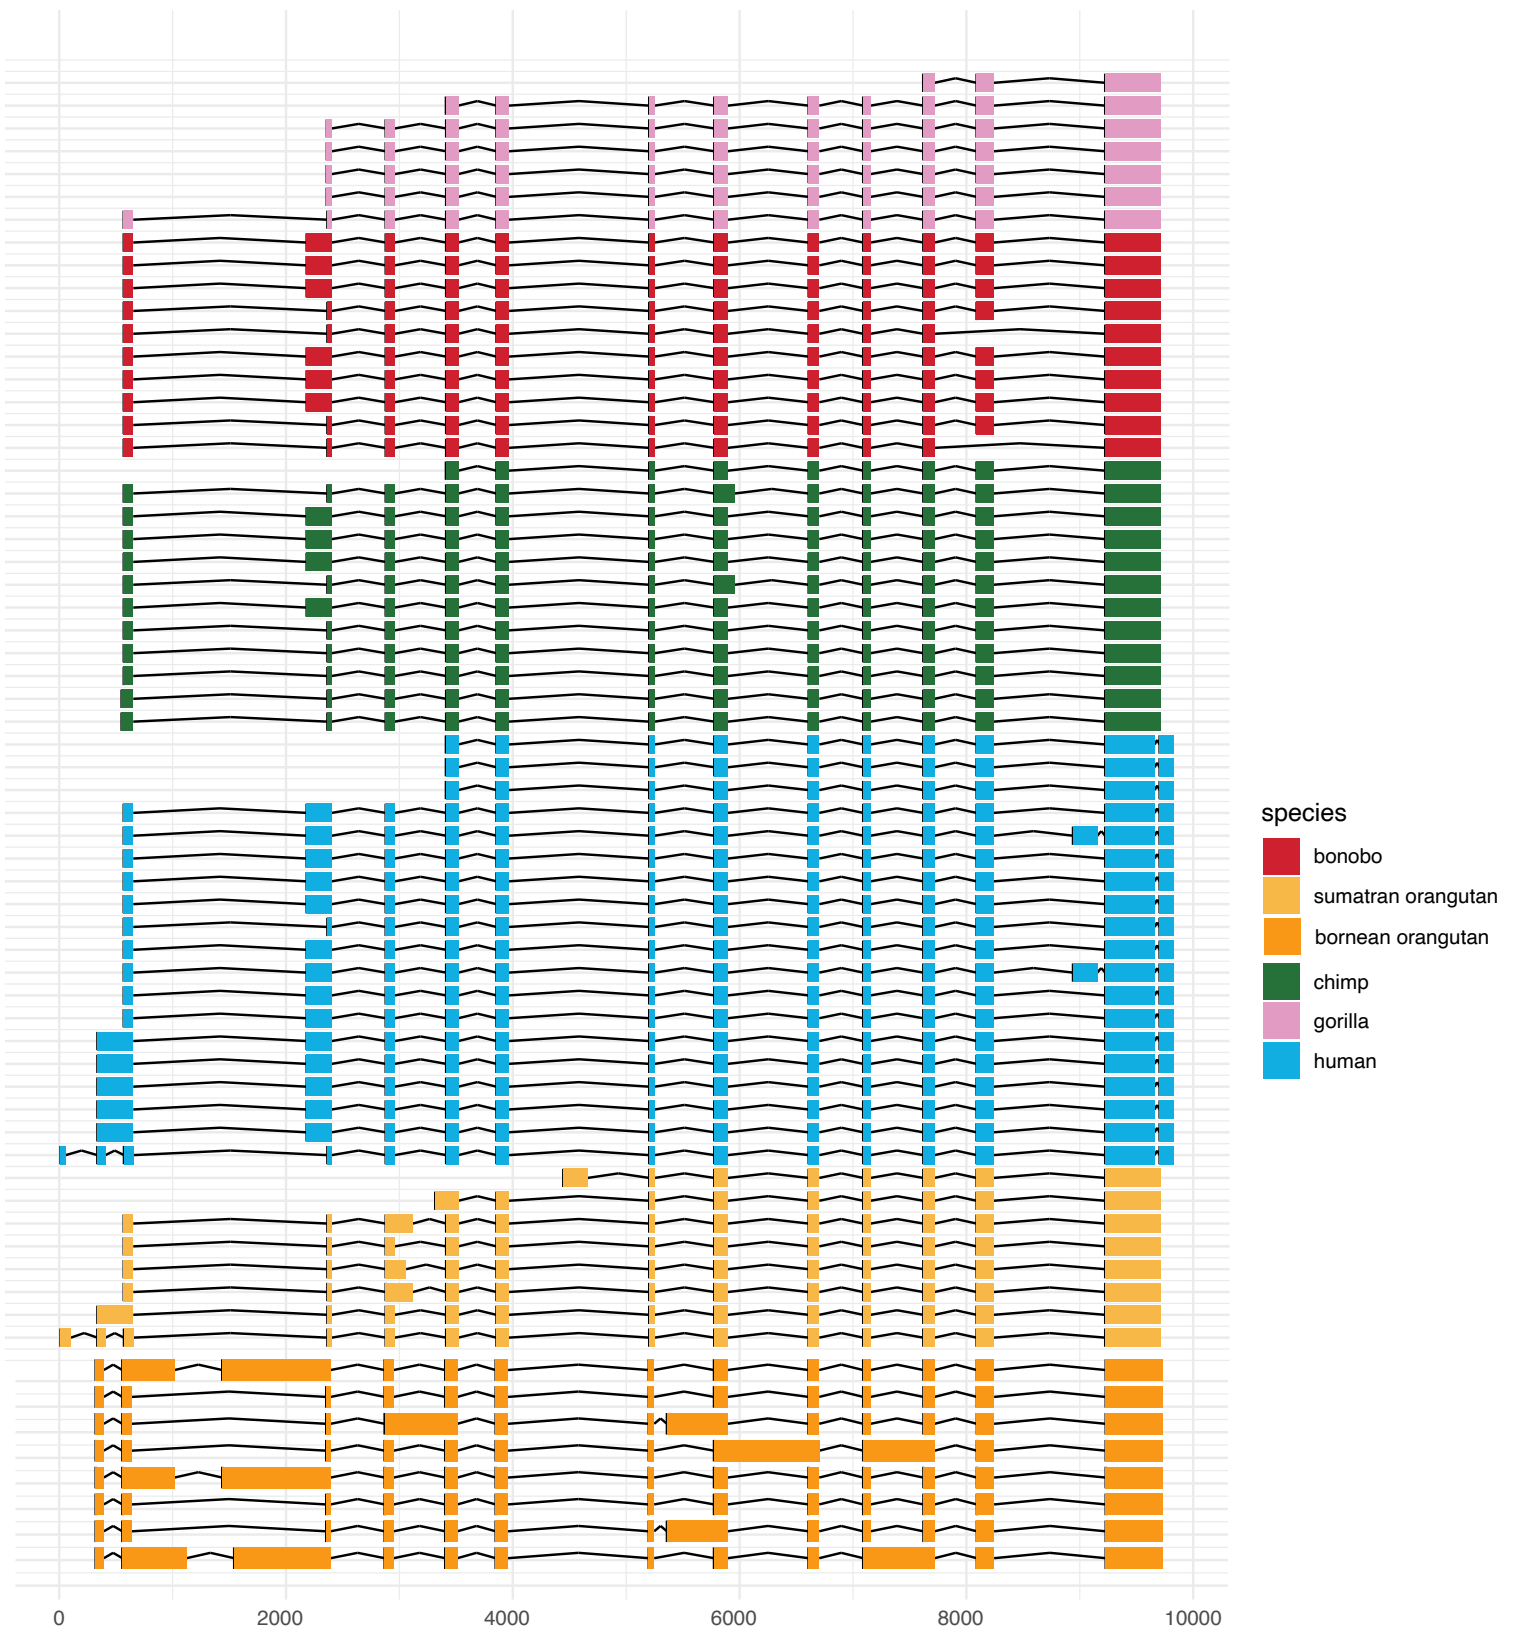

**Supplemental Figure S7: Expressed *TBCID3* paralog isoforms.** Paralog-specific isoforms were selected for each primate based on their length, mapping quality, and expression support. We observe expression of *TBCID3* from all ape lineages examined; however, for ORF analysis Bornean orangutan and gorilla isoforms were removed due to lack of expression support or intron retention.
