# Supplementary material for: Independent expansion, selection, and hypervariability of the TBC1D3 gene family in humans
Source: PubMed Central journal article supplement (PMC11610581; doi:10.1101/gr.279299.124), 2024-11
Supplement: Supplemental_Fig_S8.pdf [file Supplemental_Fig_S8.pdf]

T2T *TBC1D3* mapping::chr17:60876851-60887769(-) *TBC1D3L* terminal exon amino acid sequence

```
CAGACAGAGCTGCTGGGTCGGTCCATATCCAGGAGGACCAGCCGGCCACCTGCTGGCAGGCTGAACACCTGCGGAGCGGGTGAGATCGGCTTTCAGTCACTGAGCCACAACGTGGGCATGGACTTCCCGGCCCTGCAGTGCGCCAGCACTGATTCCGACCAGG
R Q S C W V R A I S Q E D Q P A T C W Q A E H P A E R V R S A ff f S A P S T D S D Q
R Q S C W V R A I S Q E D Q L A P C W Q A E H P A E R V R S A ff.....F A A P S T D S D Q
```

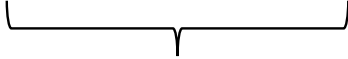

43 bp matching other NHP *TBC1D3* copies  
absent in expressed human paralogs, but  
present in distal q-arm pseudogene

**Supplemental Figure S8: Missing 43 bp deletion in human distal *TBC1D3* pseudogenes.** Human-expressed *TBC1D3*, with ORF modified by a 43 bp deletion, was mapped to all primate *TBC1D3* copies, including all human *TBC1D3* copies, with prosplign (Kiriyutin et al. 2017). Prosplign predicts the genomic nucleotides that represent codons of a given amino acid. We observe that distal *TBC1D3* pseudogenes lack the 43 bp deletion universally present in cluster 1 and 2 human *TBC1D3* copies.
