# Supplementary material for: Independent expansion, selection, and hypervariability of the TBC1D3 gene family in humans
Source: PubMed Central journal article supplement (PMC11610581; doi:10.1101/gr.279299.124), 2024-11
Supplement: Supplemental_Fig_S9.pdf [file Supplemental_Fig_S9.pdf]

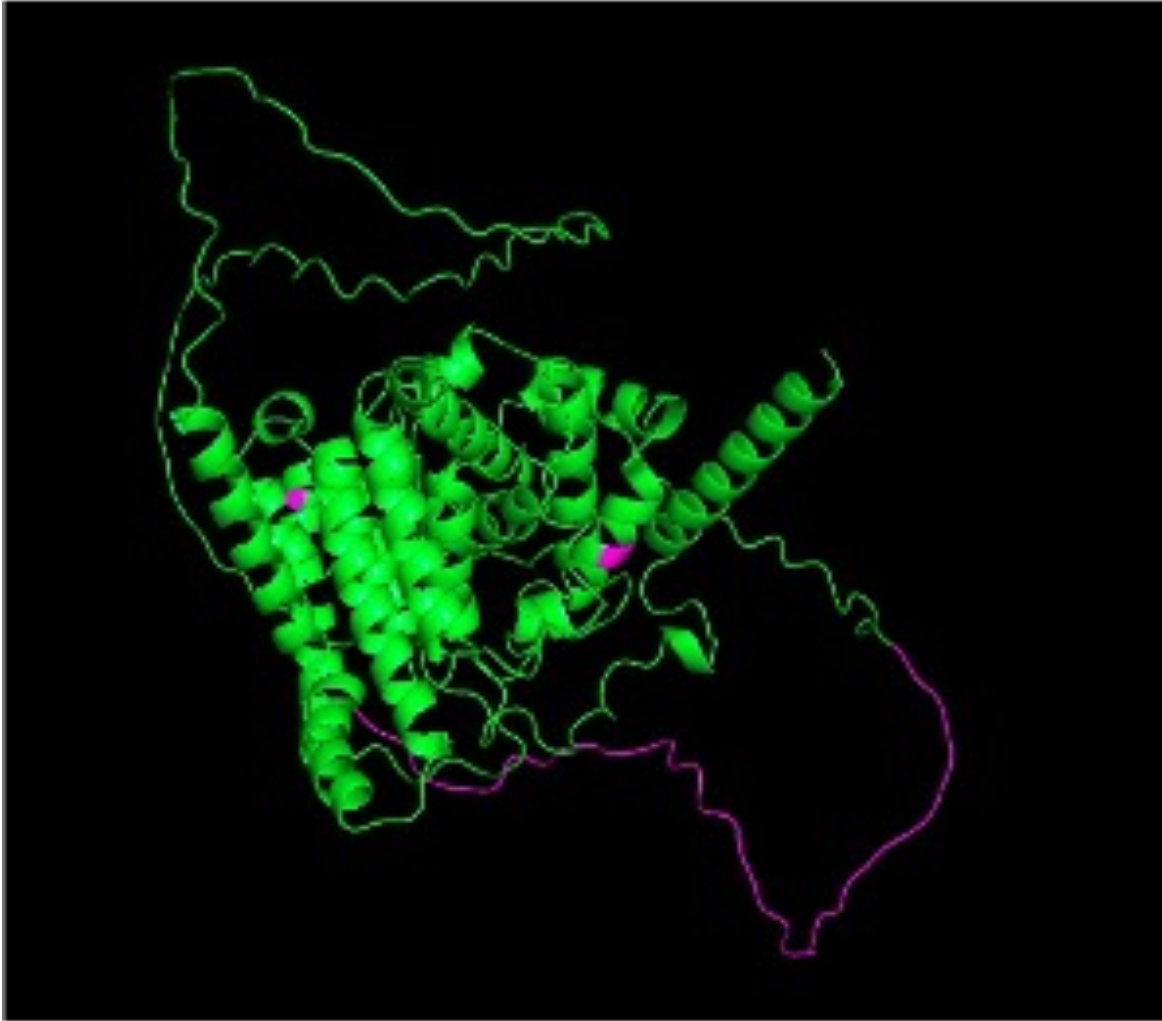

**Supplemental Figure S9: Human *TBC1D3* predicted tertiary structure.** Human *TBC1D3* was predicted with AlphaFold2 (<https://alphafold.ebi.ac.uk/>). Human lineage amino acid changes, including the modified carboxy terminus, are indicated with violet. We observe that the 41 aa novel C-terminus tertiary structure could not be predicted and is disordered.
